# Supplementary material for: Microarray Expression Analysis of the Main Inflorescence in Brassica napus
Source: PLoS One. 2014 Jul 9;9(7):e102024. doi: 10.1371/journal.pone.0102024 (PMC4090195; doi:10.1371/journal.pone.0102024)
Supplement: Table S3 — A list of primers of differentially expressed genes used for quick functional analysis in Arabidopsis . (XLSX) [file pone.0102024.s003.xlsx]

## Sheet: Sup file 3
Supplemental file 3. Gene-specific primers for Quantitative Real-time PCR
Genes	Primers(5'-3')	Note
M13-F	CGCCAGGGTTTTCCCAGTCACGAC
M13-R	AGCGGATAACAATTTCACACAGGA
TPI-F	ATGGCCAGAAAGTTCTTCGTC
TPI-R	TCAAGCGCTTTTCTTCACCTC
gtpi-f	GCTCTAGAATGGCCAGAAAGTTCTTCGTC	xba1
gtpi-r	AAACTGCAGTCAAGCGCTTTTCTTCACCTC	pst1
PTPI-F	GTGAAACATGGCATTGGATTG
PTPI-R	GGAGTCACAGAAACGACGATG
ptpi-f	GGAATTCGTGAAACATGGCATTGGATTG	EcoR1
ptpi-r	AAAGTCGACGGAGTCACAGAAACGACGATG	Sal1
35s-f	GACCCTTCCTCTATATAAG
cgt-r	GACCCTTCCTCTATATAAG
qtpi-f	AAGTGGCTCGCAAAGAACG
qtpi-r	TTAGAGAAGCACCACCGACC
QACTIN2-f	GGTAACATTGTGCTCAGTGGTGG
QACTIN2-r	AACGACCTTAATCTTCATGCTGC
BnActin2-F	GTGTTGTTGGTAGGCCAAGGCATCA
BnActin2-R	CTTGATGTCTCTTACAATTTCCCGC
Note: f and r denote forward and reverse primers.
